# Supplementary material for: Unraveling the mechanism of the CO 2 -assisted oxidative dehydrogenation of propane over VO x /CeO 2 : an operando spectroscopic study
Source: Royal Society of Chemistry journal article supplement (doi:10.1039/d4su00527a), 2024-01-01
Supplement: d4su00527a1.pdf [file d4su00527a1.pdf]

## Supporting Information

### Unraveling the Mechanism of the CO<sub>2</sub>-Assisted Oxidative Dehydrogenation of Propane over VO<sub>x</sub>/CeO<sub>2</sub>: An Operando Spectroscopic Study

Leon Schumacher, Marius Funke, Christian Hess\*

Technical University of Darmstadt, Department of Chemistry, Eduard-Zintl-Institut für  
Anorganische und Physikalische Chemie, Peter-Grünberg-Str. 8, 64287 Darmstadt,  
Germany

\*Corresponding Author (E-Mail: [christian.hess@tu-darmstadt.de](mailto:christian.hess@tu-darmstadt.de))

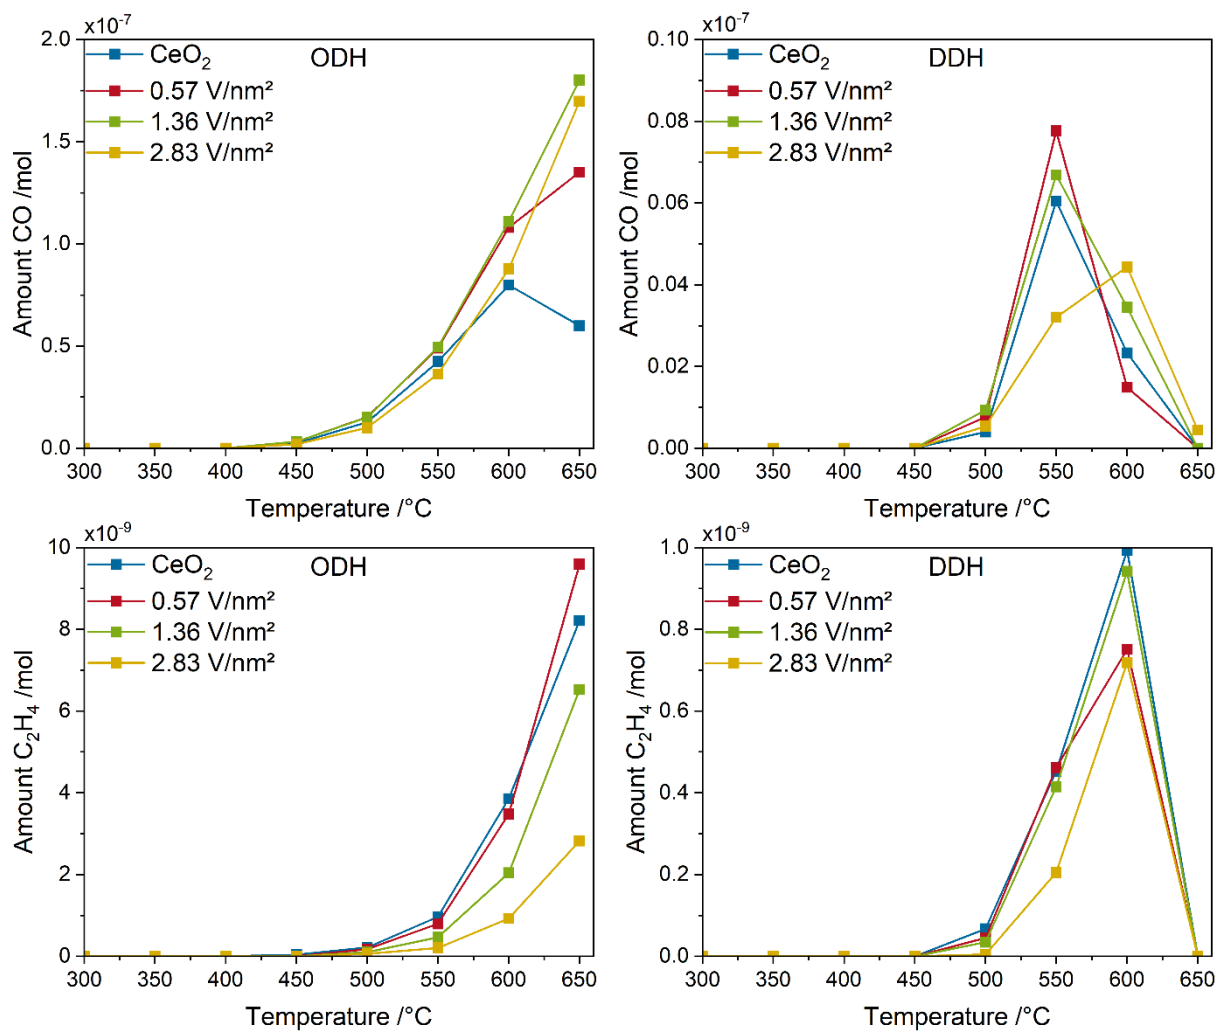

**Figure S1:** Comparison between the amounts of CO and  $C_2H_4$  created under ODH (12.5%  $CO_2$ /12.5%  $C_3H_8$ /He) and DDH (12.5%  $C_3H_8$ /He) conditions for ceria and vanadia-loaded samples.

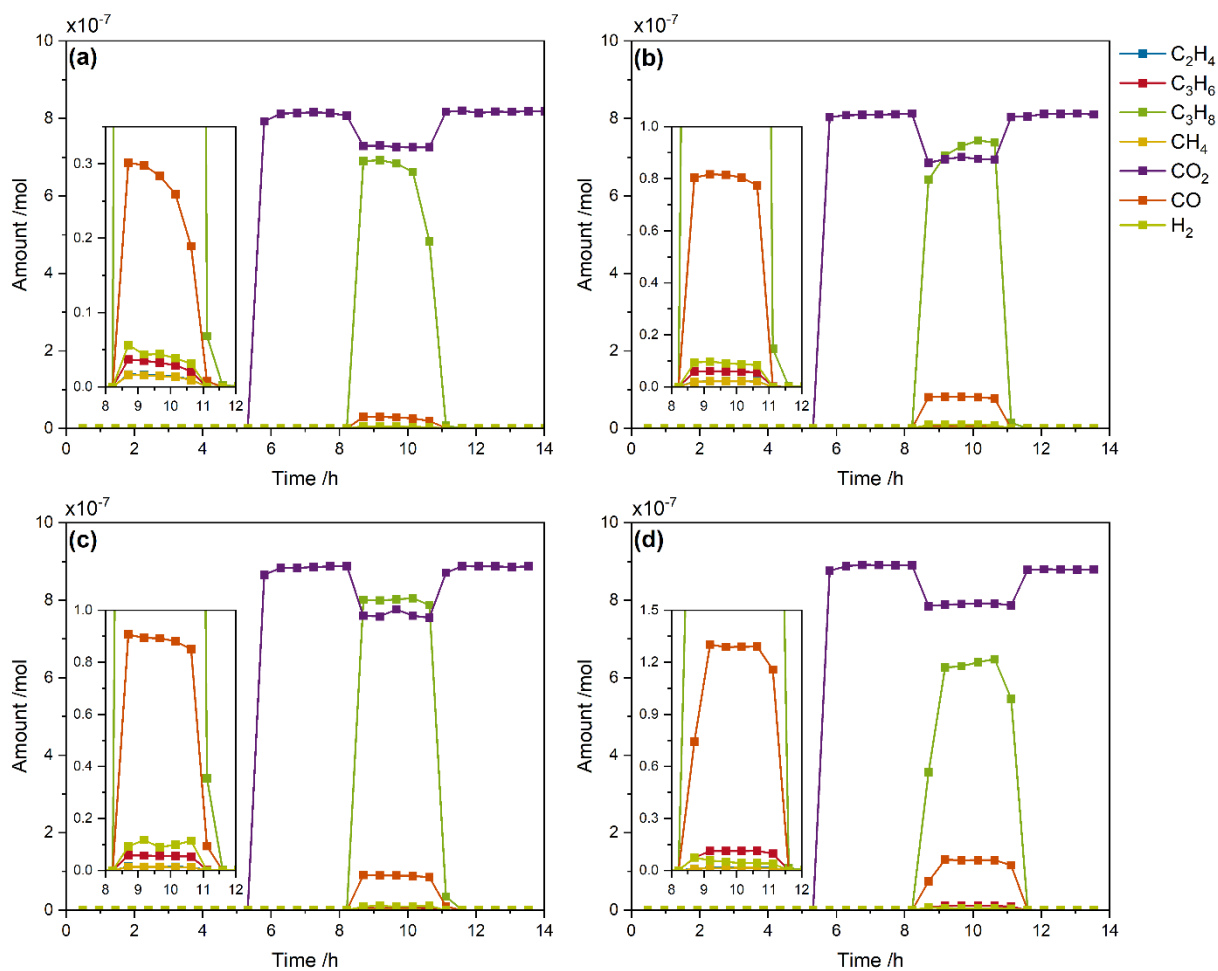

**Figure S2:** Molar product distributions of all detected reaction products formed by (a)  $\text{CeO}_2$ , (b) 0.57, (c) 1.36, and (d) 2.83  $\text{V}/\text{nm}^2$  under different gas feeds (see experimental section) at 550 °C. The insets show the product distribution during ODH conditions (12.5%  $\text{CO}_2$ /12.5%  $\text{C}_3\text{H}_8$ /He) in an enlarged view for each sample.

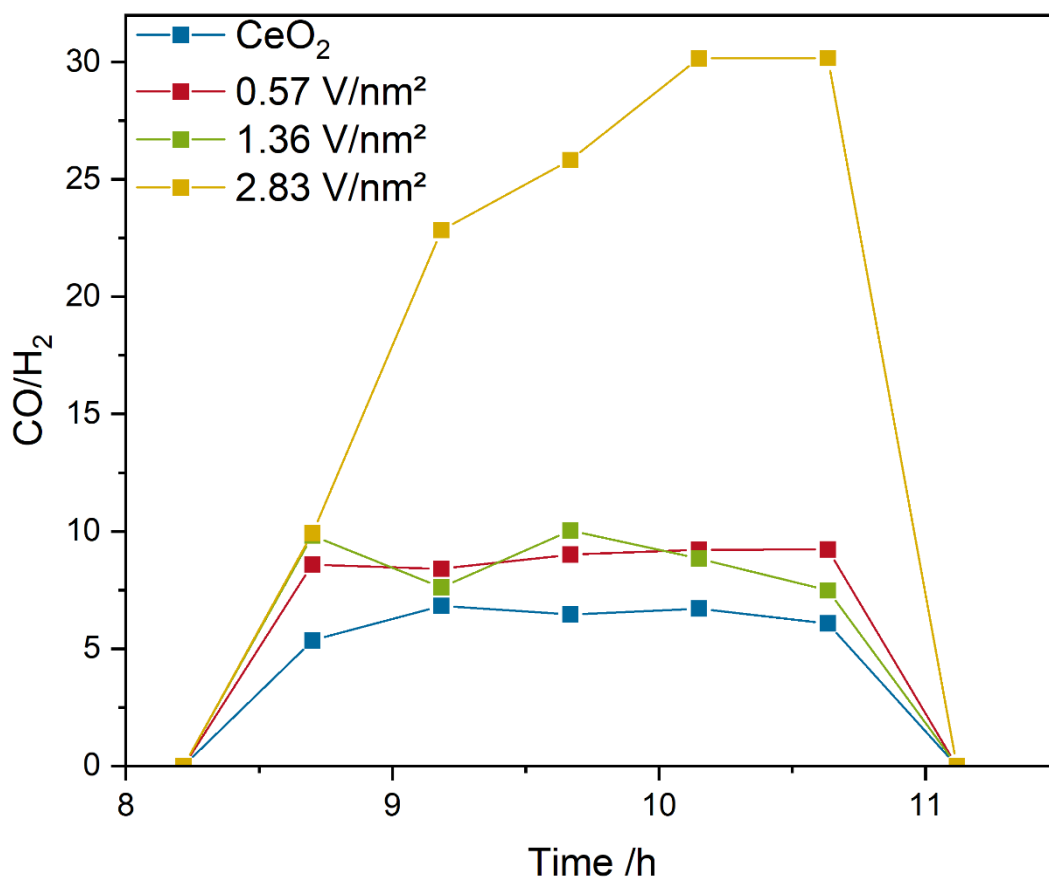

**Figure S3:** CO/H<sub>2</sub> ratio under ODH conditions (12.5% CO<sub>2</sub>/12.5% C<sub>3</sub>H<sub>8</sub>/He) for ceria and vanadia-loaded samples as an indicator for the ODH/DDH+RWGS ratio.

**Table S1:** Calculated carbon balances from chromatograms measured during 12.5% CO<sub>2</sub>/12.5% C<sub>3</sub>H<sub>8</sub>/He exposure at 550 °C.

| Sample            | CeO <sub>2</sub> | 0.57 V/nm <sup>2</sup> | 1.36 V/nm <sup>2</sup> | 2.83 V/nm <sup>2</sup> |
|-------------------|------------------|------------------------|------------------------|------------------------|
| Carbon Balance /% | 6.6              | 6.2                    | 6.3                    | 7.2                    |

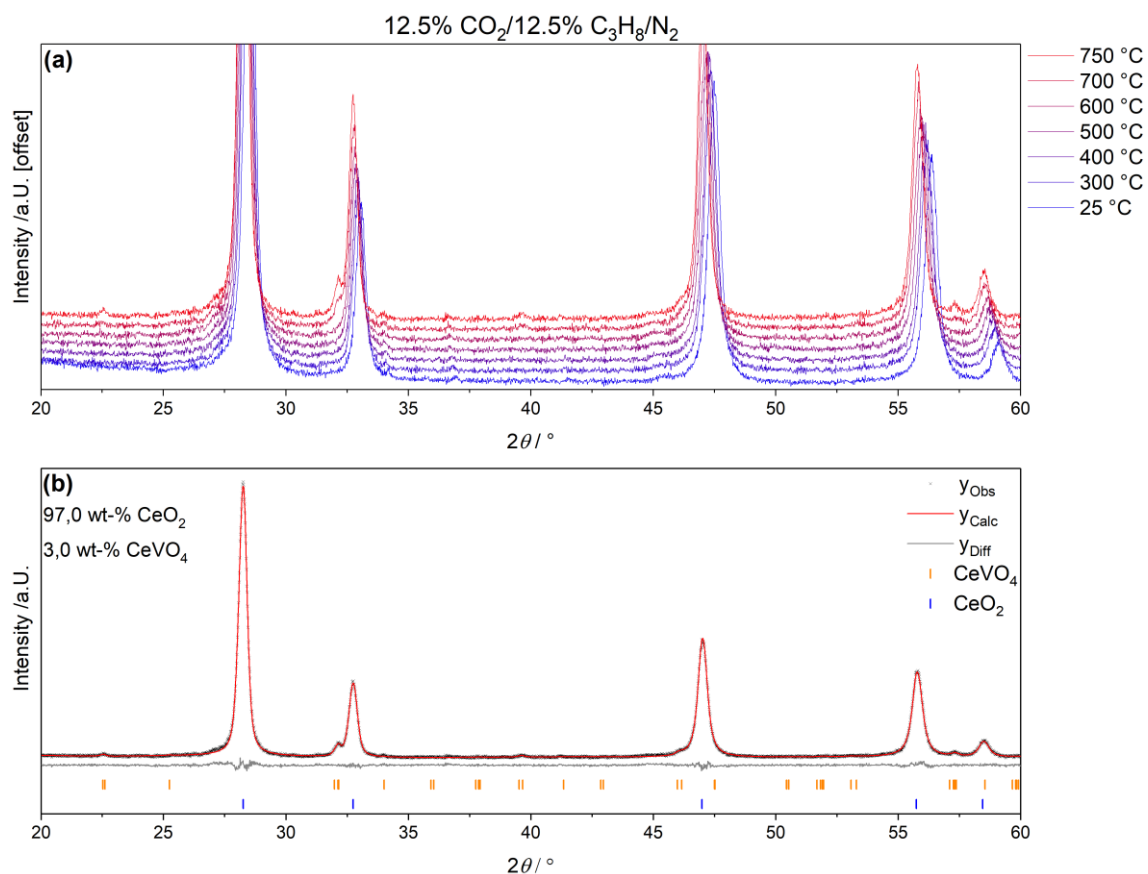

**Figure S4:** (a) In situ XRD patterns of the 2.83 V/nm<sup>2</sup> sample under ODH conditions (12.5% CO<sub>2</sub>/12.5% C<sub>3</sub>H<sub>8</sub>/N<sub>2</sub>) between 25 and 750 °C and (b) Rietveld analysis of the diffraction pattern recorded at 750 °C to quantify CeVO<sub>4</sub>.

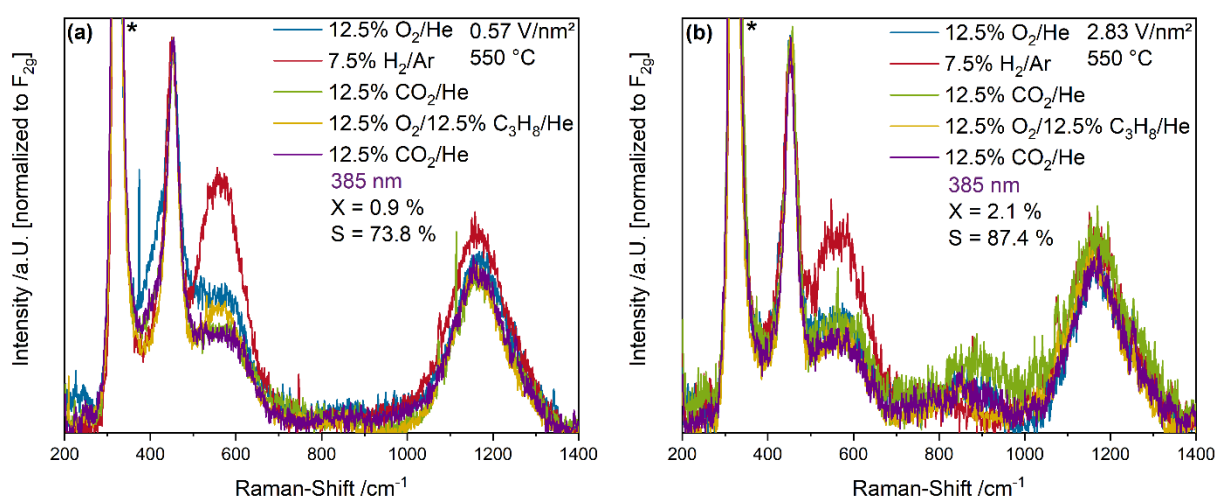

**Figure S5:** Operando UV-Raman spectra (385 nm excitation) of (a) the 0.57 and (b) the 2.83 V/nm<sup>2</sup> sample recorded under different gas feeds at 550 °C. The spectra are normalized to the F<sub>2g</sub> mode and the peak caused by the CaF<sub>2</sub> window is marked with an asterisk. The conversions and selectivities are given.

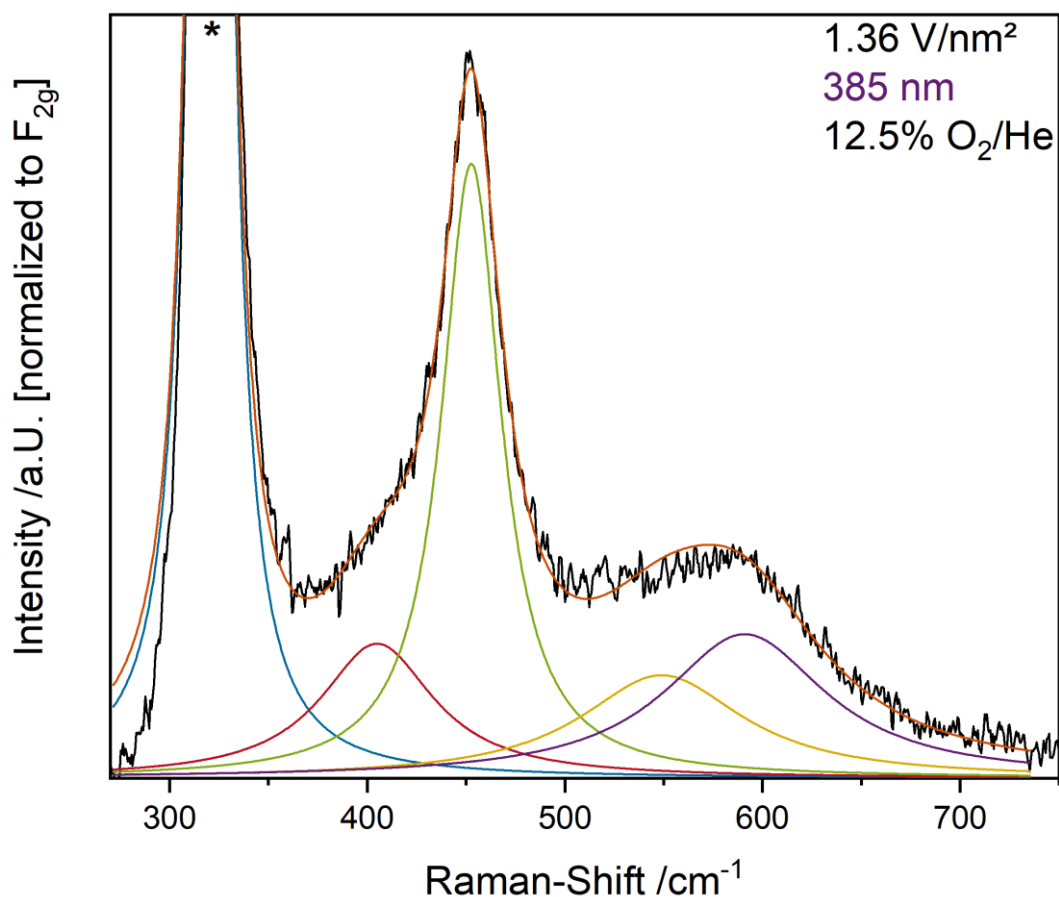

**Figure S6:** Exemplary fit of the 1.36 V/nm<sup>2</sup> sample under 12.5% O<sub>2</sub>/He at 550 °C. The spectrum was normalized to the F<sub>2g</sub> peak and the peak caused by the CaF<sub>2</sub> peak is marked with an asterisk. Two components were used to fit the defect region in agreement with previous literature. The CaF<sub>2</sub> peak was also fitted as it overlapped notably with the other signals.

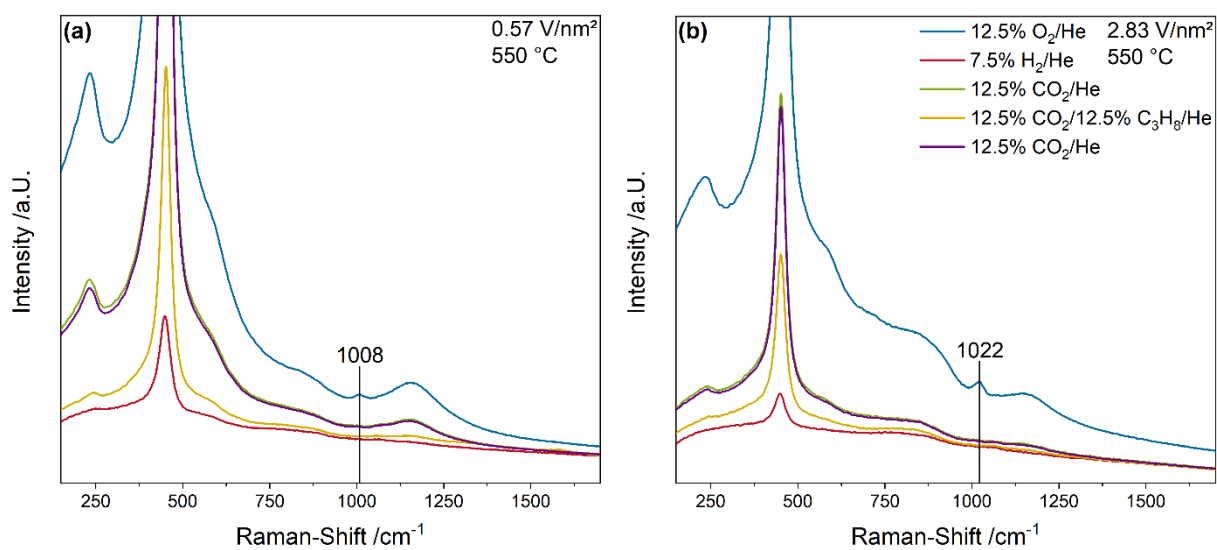

**Figure S7:** Operando Vis-Raman spectra (514 nm excitation) of (a) the 0.57 and (b) the 2.83 V/nm<sup>2</sup> samples under different gas feeds recorded at 550 °C. The vanadyl peak is highlighted.

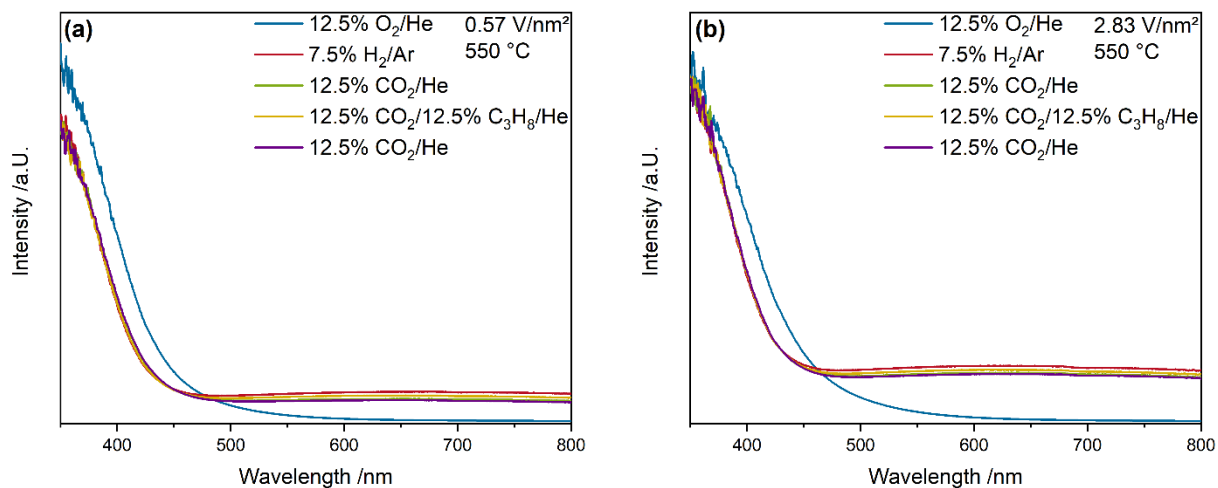

**Figure S8:** Operando UV-Vis spectra (385 nm excitation) of **(a)** the 0.57 and **(b)** the 2.83 V/nm<sup>2</sup> sample recorded under different gas feeds at 550 °C.

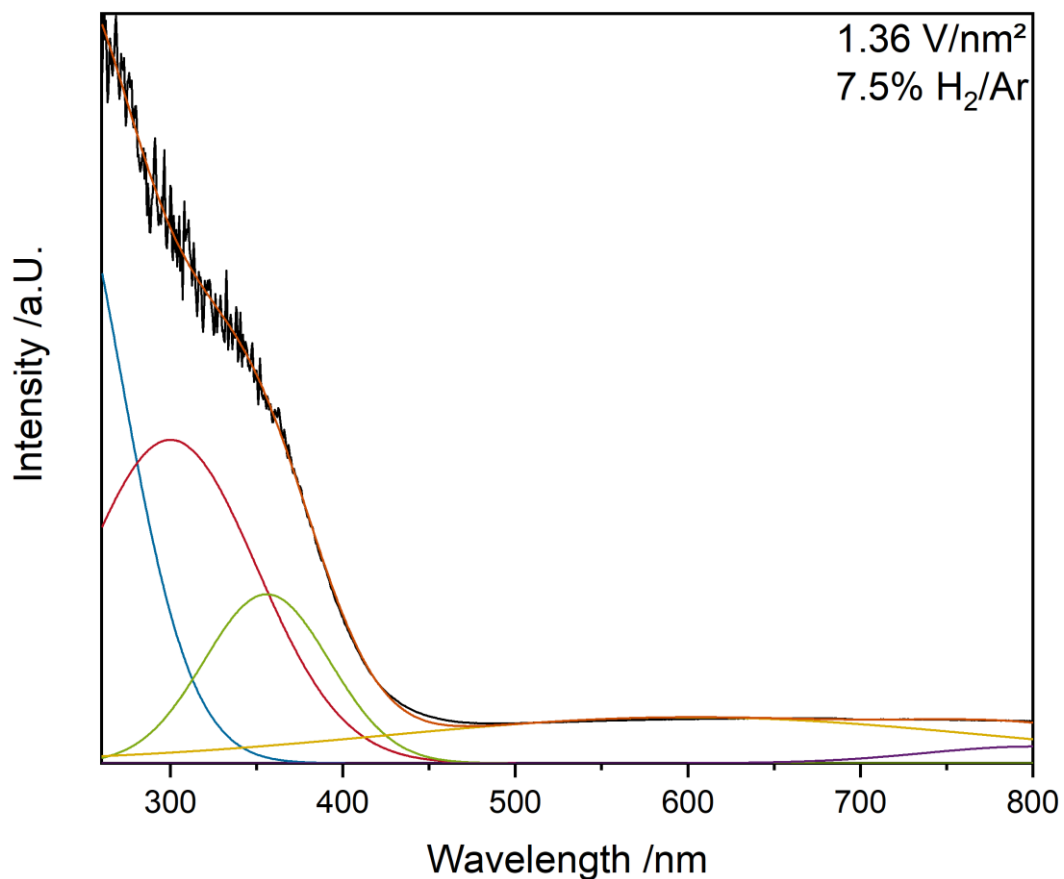

**Figure S9:** Exemplary fit of the UV-Vis spectrum of the 1.36 V/nm<sup>2</sup> sample under reductive conditions at 550 °C using five Gaussian-Lorentzian product functions (see experimental section).

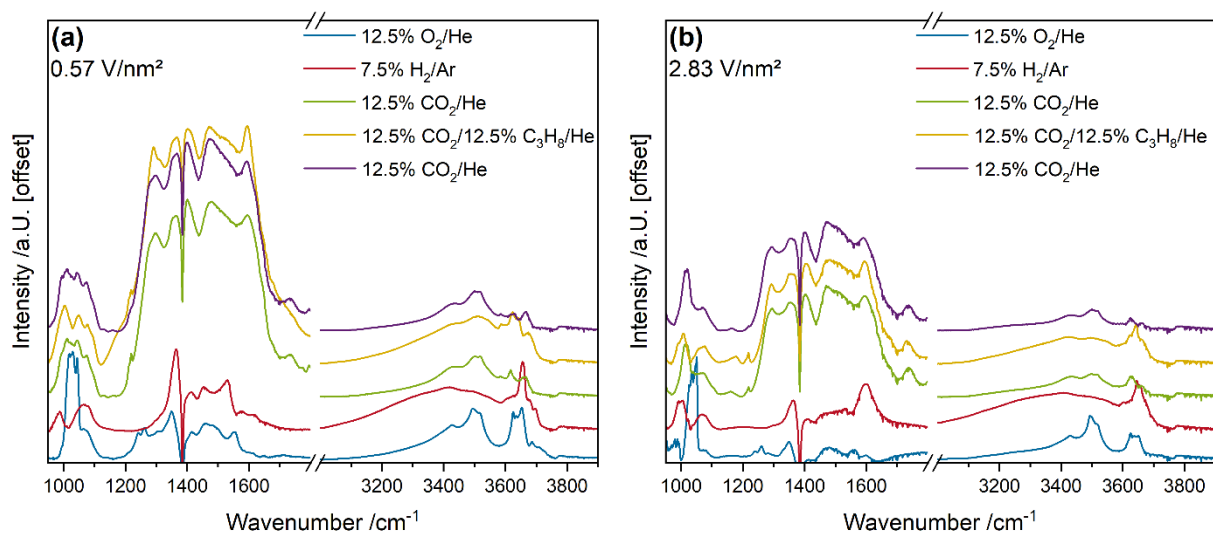

**Figure S10:** Quasi in situ DRIFT spectra of (a) the 0.57 and (b) the 2.83 V/nm<sup>2</sup> sample recorded after pre-treatment under the indicated gas feeds at 550 °C and subsequent rapid cooling (200 °C/min) to room temperature under helium.

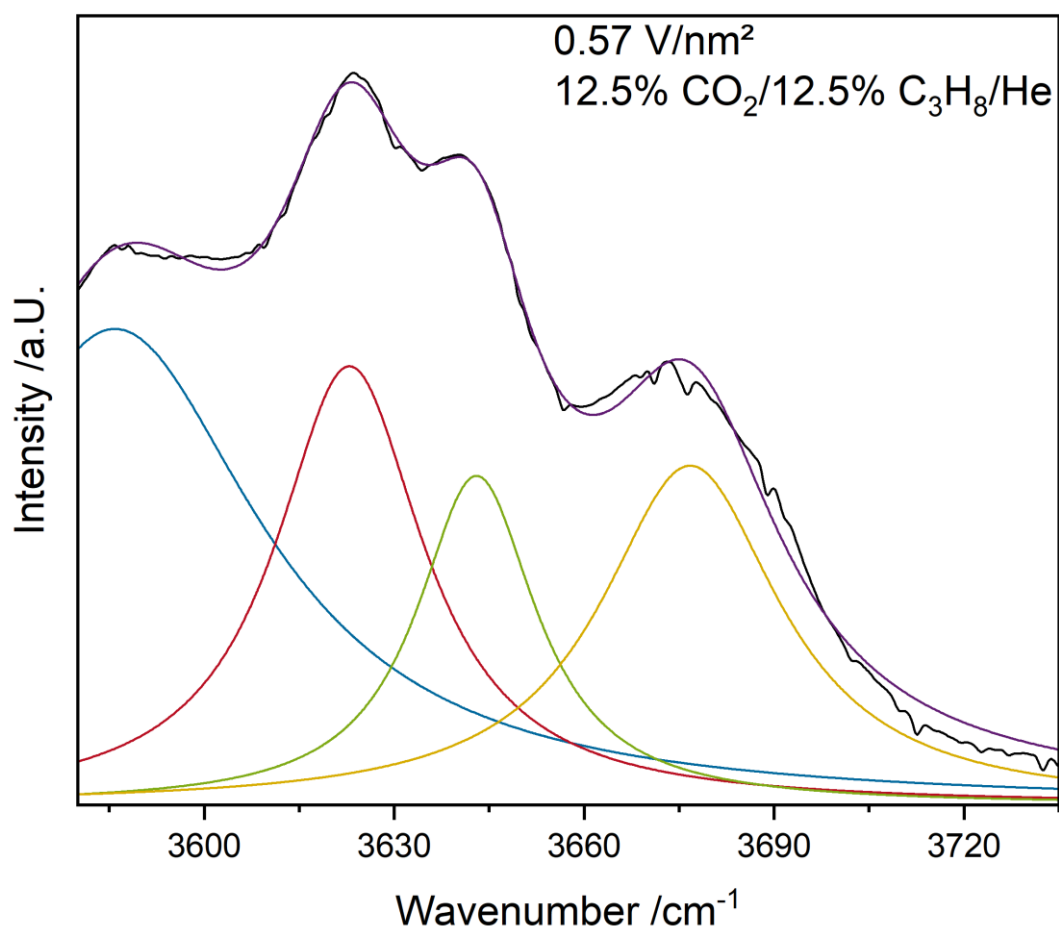

**Figure S11:** Exemplary fit of the Ce-OH region of the 0.57 V/nm<sup>2</sup> sample under ODH conditions using four Lorentzian functions.
